# Supplementary material for: C-terminus of HSC70-Interacting Protein (CHIP) Inhibits Adipocyte Differentiation via Ubiquitin- and Proteasome-Mediated Degradation of PPARγ
Source: PubMed Central journal article supplement (PMC5216347; doi:10.1038/srep40023), 2017-01-06

**C-terminus of HSC70-Interacting Protein (CHIP) Inhibits Adipocyte  
Differentiation via Ubiquitin- and Proteasome-Mediated Degradation of  
PPAR $\gamma$**

**Jung-Hoon Kim, Soyeon Shin, Jinho Seo, Eun-Woo Lee, Manhyung Joeng, Min-sik Lee, Hyun-Ji Han,  
Jaewhan Song\***

Department of Biochemistry, College of Life Science and Biotechnology, Yonsei University, Seoul, 120-749

\*Corresponding author: J. Song, Department of Biochemistry, Yonsei University, Yonsei-ro 50, Seodaemun-gu,  
Seoul 120-749, Republic of Korea; E-mail: jso678@yonsei.ac.kr; Tel.: +82 2 2123 5695; Fax: +82 2 362 9897

## Supplementary information

### Supplementary Figure Legend

**Supplementary Figure 1. PPAR $\gamma$ 1 is regulated by CHIP.** (a) PPAR $\gamma$ 1 binds to the CHIP protein. Lysates of HEK 293T cells transfected with pcDNA3.1-PPAR $\gamma$ 1 and pcDNA3 FLAG-CHIP plasmids in the presence of MG132 were immunoprecipitated with  $\alpha$ -FLAG antibodies, and western blots were performed using  $\alpha$ -FLAG and  $\alpha$ -PPAR $\gamma$  antibodies. (b) PPAR $\gamma$ 1 protein is degraded by CHIP protein. Western blots of H1299 cells transfected with FLAG-CHIP, FLAG-CHIP H260Q, PPAR $\gamma$ 1, and 6XMYC expressing vectors were performed using the indicated antibodies. (c) PPAR $\gamma$ 1 is destabilized by CHIP. Western blots of H1299 cells transfected with FLAG-CHIP, FLAG-CHIP H260Q, and PPAR $\gamma$ 1-expressing plasmids with CHX for the indicated length of time (0, 1, or 2 hours) were performed using the indicated antibodies.

**Supplementary Figure 2. Exogenous PPAR $\gamma$ 2 protein was regulated by CHIP through the proteasomal degradation.** (a) PPAR $\gamma$ 2 protein was degraded by CHIP. Western blots of H1299 cells transfected with pcDNA3.1-PPAR $\gamma$ 2 (0.3  $\mu$ g), 6XMYC (0.3  $\mu$ g), and increasing concentrations of FLAG-CHIP (0.2, 0.3, and 0.4  $\mu$ g) were performed using  $\alpha$ -FLAG,  $\alpha$ -PPAR $\gamma$ , and  $\alpha$ -MYC antibodies. 6XMYC was used as a transfection control. (b) CHIP-mediated degradation of PPAR $\gamma$  was blocked by a proteasome inhibitor. Western blots of lysates from H1299 cells transfected with the indicated plasmids and treated with or without MG132, a proteasome inhibitor were performed using the indicated antibodies. (c) The CHIP H260Q mutant does not degrade the PPAR $\gamma$  protein. Western blots of H1299 cells transfected with the indicated plasmids were performed with the indicated antibodies.

**Supplementary Figure 3. PPAR $\gamma$ 1 is ubiquitylated by CHIP.** CHIP ubiquitinates PPAR $\gamma$ 1 using the E3 ligase function. Lysates of H1299 cells transfected with pcDNA3-FLAG-CHIP, pcDNA3-FLAG-CHIP H260Q, PRK5-HA-Ub, and pcDNA3.1-PPAR $\gamma$ 1 in the presence of MG132 were immunoprecipitated with  $\alpha$ -PPAR $\gamma$  antibodies, and western blots were performed using the indicated antibodies.

**Supplementary Figure 4. HSP90 does not affect CHIP-mediated PPAR $\gamma$  degradation.** (a) Western blots of H1299 cells transfected with pcDNA3.1-PPAR $\gamma$ , pcDNA3-HA-CHIP, pcDNA3-HA-CHIP H260Q, pcDNA3-HA-CHIP K30A, and PBEG-GST plasmids with or without 100 nM GA during 20 hour were performed using the indicated antibodies. GST was used as a transfection control.

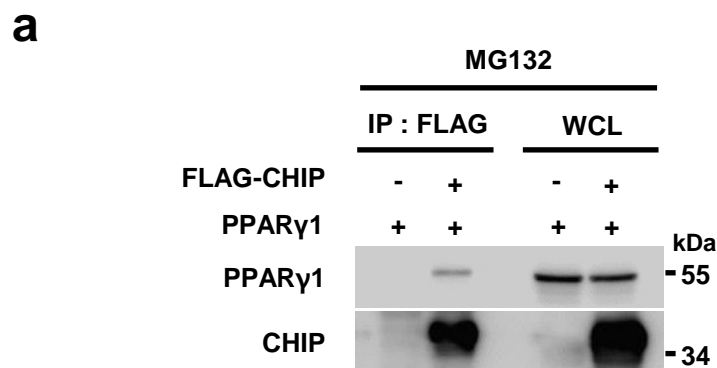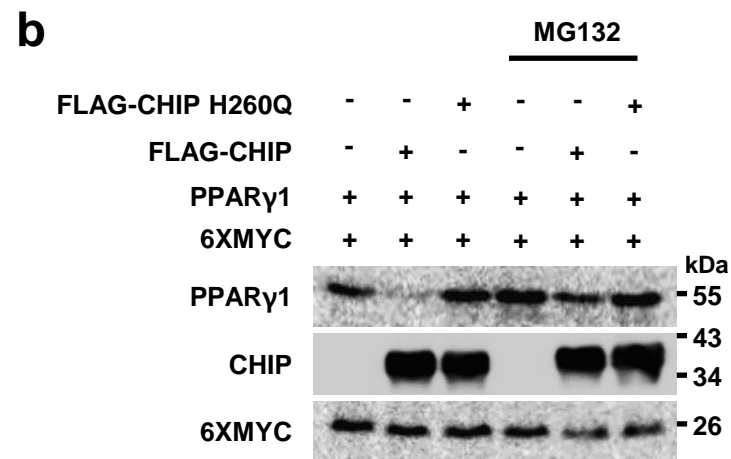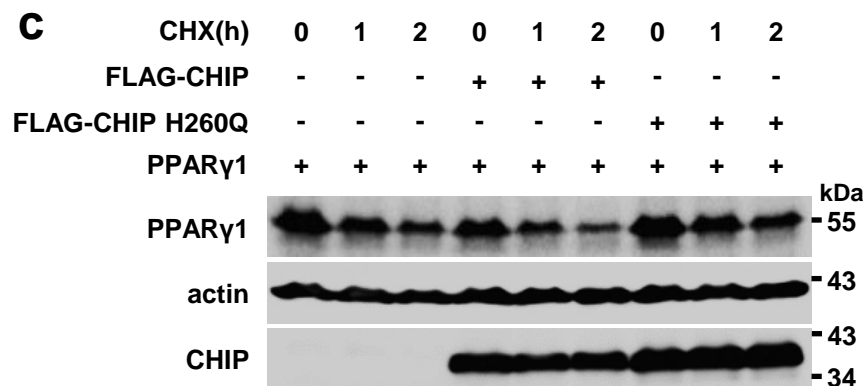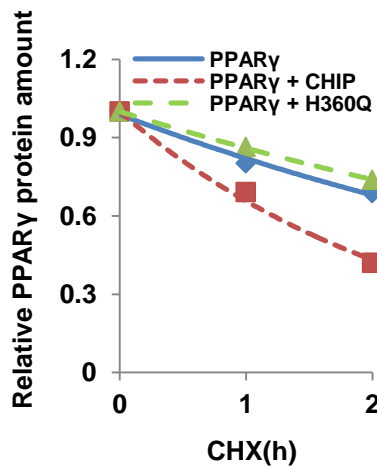

**a**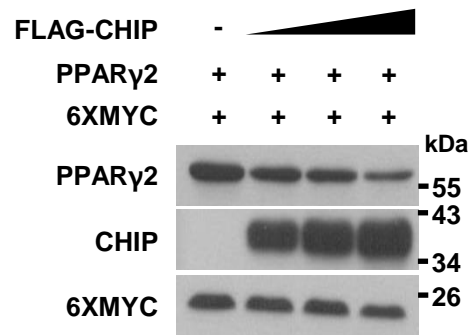**b**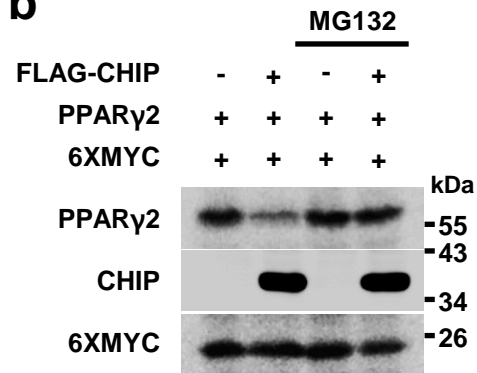**c**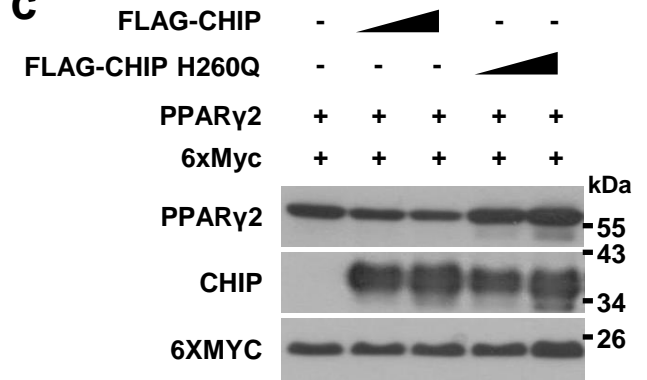

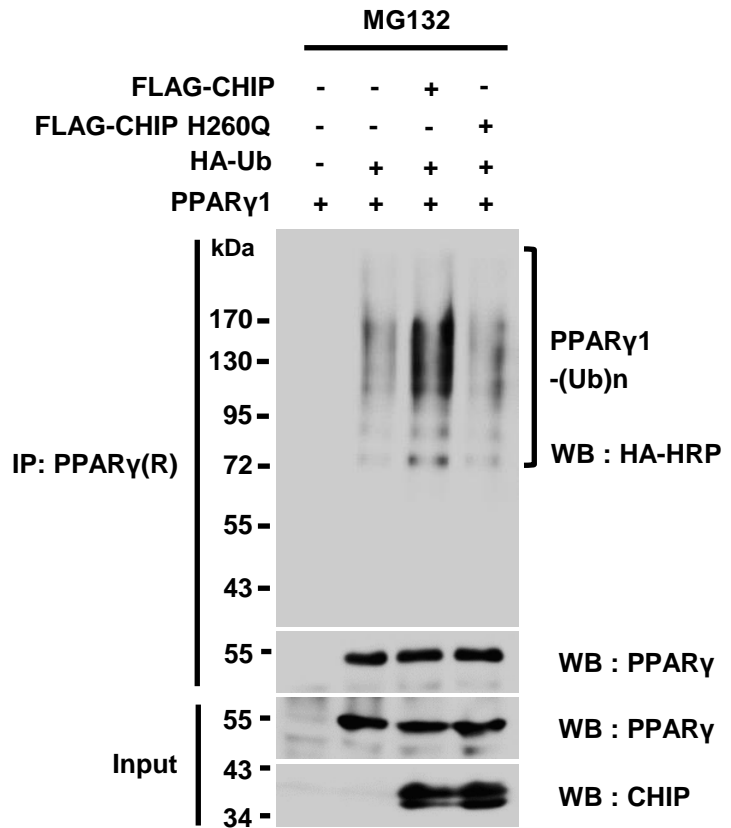

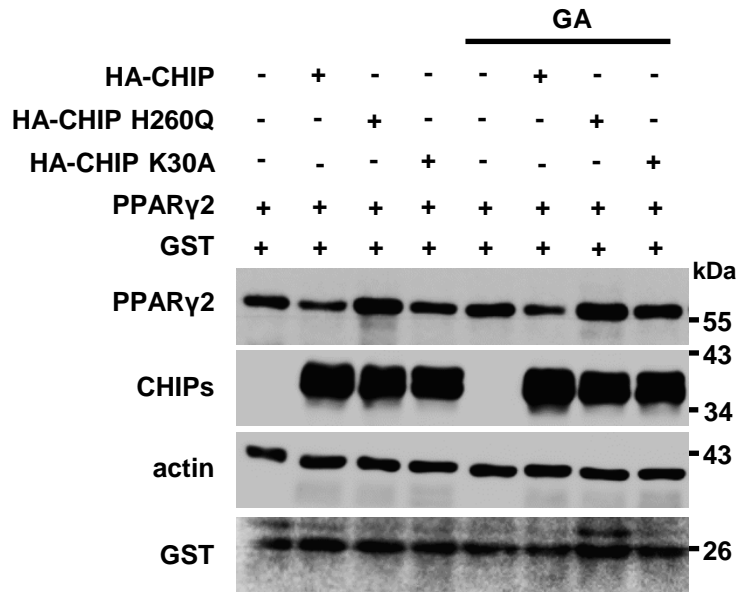

Supplement: srep40023-s1.pdf [file srep40023-s1.pdf]
